# Supplementary material for: The Role of the ADF Gene Family in Maize Response to Abiotic Stresses
Source: MDPI journal article supplement (doi:10.3390/agronomy14040717), 2024-03-29
Supplement: s1 [file s1]

Supplemental data

Supplemental Figure S1

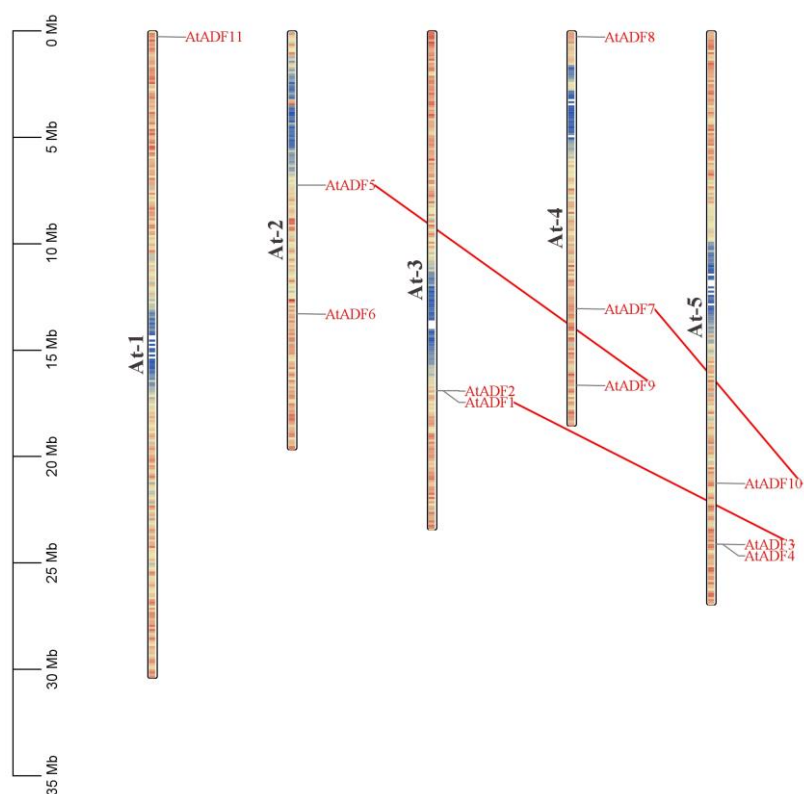

Figure S1 The chromosome distribution and gene duplication map of the ADF gene family in Arabidopsis, which show five chromosomes, namely chromosomes 1, 2, 3, 4, and 5. The left side of each chromosome is marked with black chromosome number, and the right side is marked with red chromosome location distribution of 11 AtADF genes. The red line represents gene pairs undergoing tandem duplication.
